# Supplementary material
Source: Research Square preprint supplement (doi:10.21203/rs.3.rs-9983279/v1)
Supplement: Supplementary file 3 [file f04b765ae127410f8184b120.pdf]

# **Decelerating Death: Estimating Changes in Life Expectancy from Dietary Risk Factors Using Accelerated Failure Time**

Teresa Rebelo<sup>1</sup>, Daniel Yoo<sup>1</sup>, Chirag Patel<sup>2</sup>, Olivier Jolliet<sup>1</sup>

## **Affiliations**

<sup>1</sup> Quantitative Sustainability Assessment, Department of Environmental and Resource Engineering, Technical University of Denmark, 2800 Kgs Lyngby, Denmark

<sup>2</sup> Department of Biomedical Informatics, Medical School, Harvard University, 10 Shattuck St, Boston, MA 02115, USA

**Corresponding author:** Teresa Rebelo, Technical University of Denmark, 2800 Kgs Lyngby, Denmark. Email: [tdevi@dtu.dk](mailto:tdevi@dtu.dk)

## Supplementary Information

### Supplementary Figures

**SI1.** Study framework.

**SI2.** Pearson correlation matrix of study variables.

**SI3.** Bootstrap distributions (1,000 replicates) of model discrimination during training (calculated on out-of-bag (oob) data).

**SI4.** IPCW-based calibration performance during training across prespecified ages.

**SI5.** Top 30 predictors ranked by bootstrap selection frequency during training.

**SI6:** Rank-based evaluation of predicted age at death among deceased respondents.

**SI7:** SHAP summary (beeswarm) plot for the final penalized AFT model.

**SI8:** Raindrop plot of predicted age at death across exposure levels.

**SI9:** Discrimination by subgroup for the final model.

**SI10:** Sensitivity analysis: raindrop plots stratified by participant subgroups.

## **Supplementary Tables**

**SI1.** Descriptive statistics of the study population and predictors included in the analysis (n=44,666 participants; 29 predictors).

**SI2.** Comparison of participant characteristics between complete cases included in the analysis and participants excluded due to missing data (n=21,052).

**SI3.** Multicollinearity test using the Variance Inflation Factor (VIF).

**SI4.** Multiple-testing correction for dietary exposures using the Benjamini-Hochberg false discovery rate (FDR) procedure.

## **Supplementary Information**

**SI1.** Penalized AFT model shows robust performance across resampling.

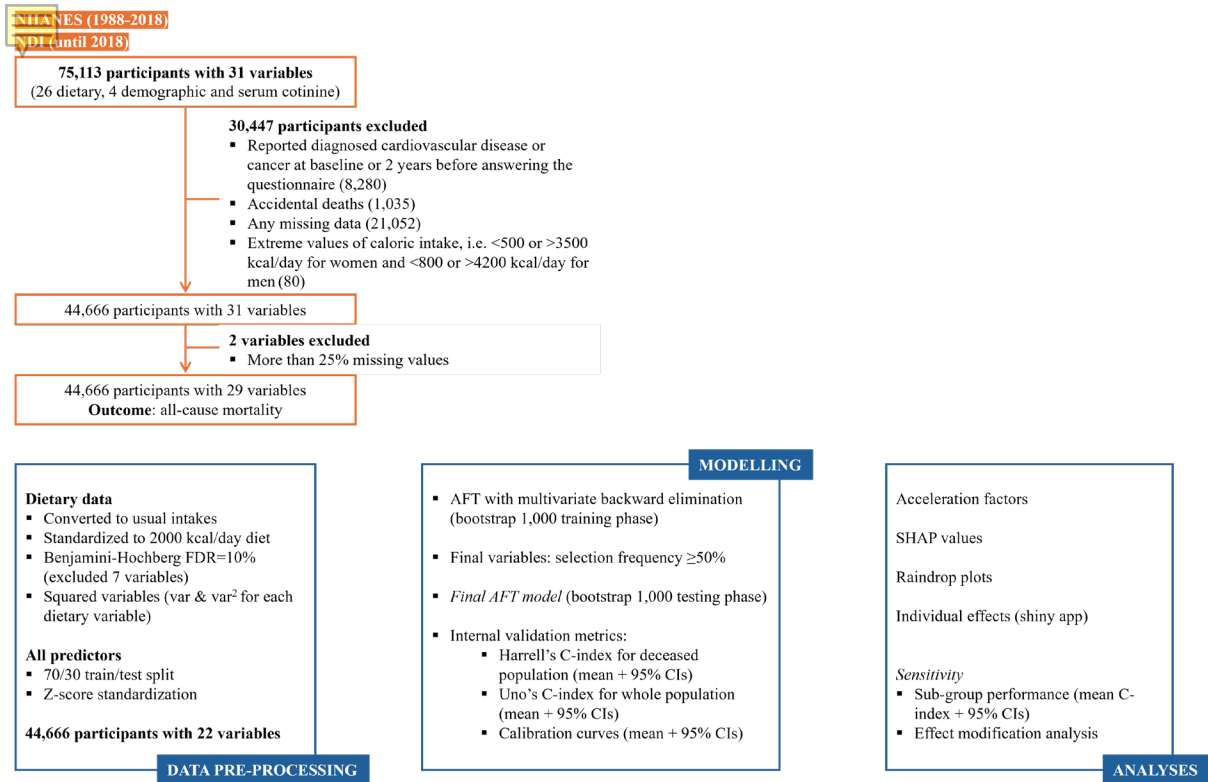

**Supplementary Figure S11: Study framework, population, variables and main steps of data processing, modeling and analyses.**

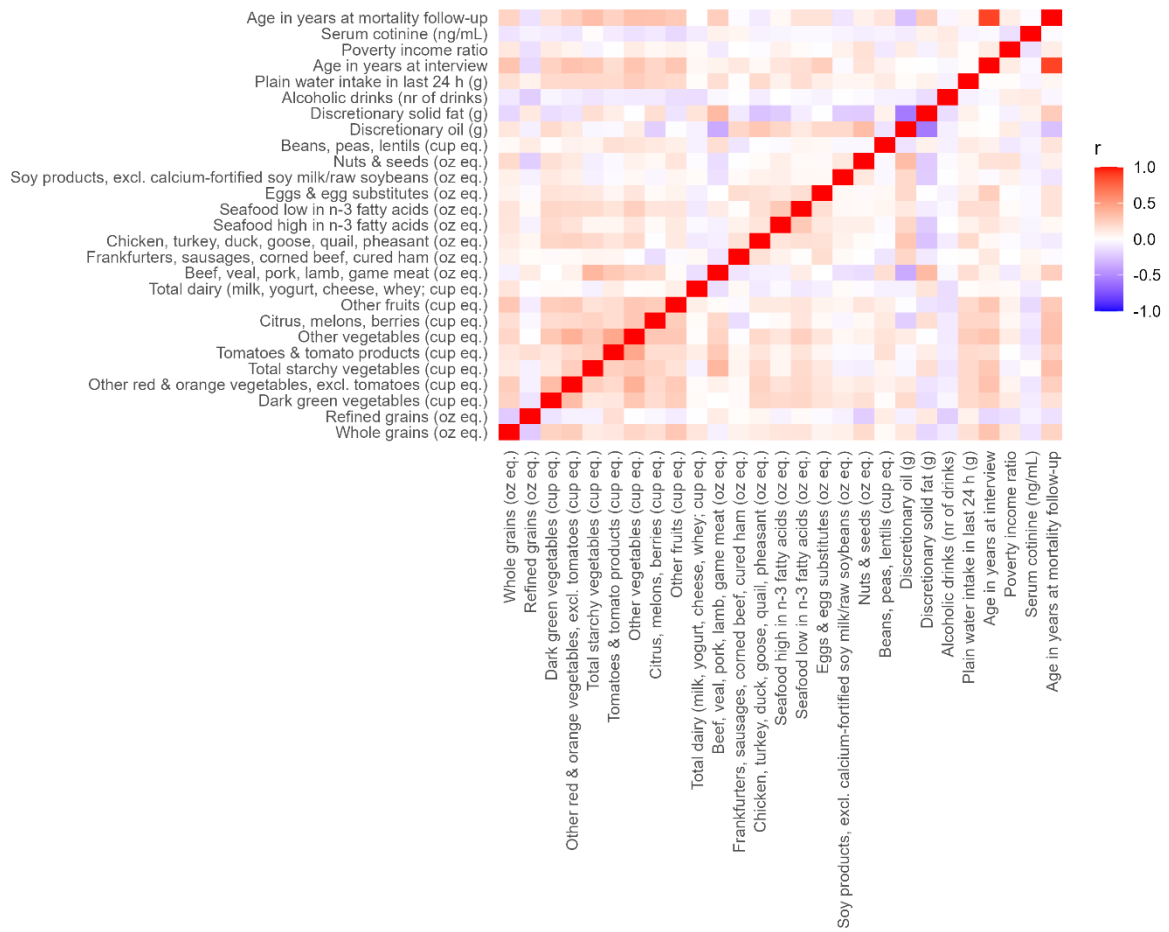

**Supplementary Figure S12:** Pearson correlation matrix of study variables. No strong correlations ( $|r| > 0.60$ ) were observed, with the exception of age at questionnaire and age at death.

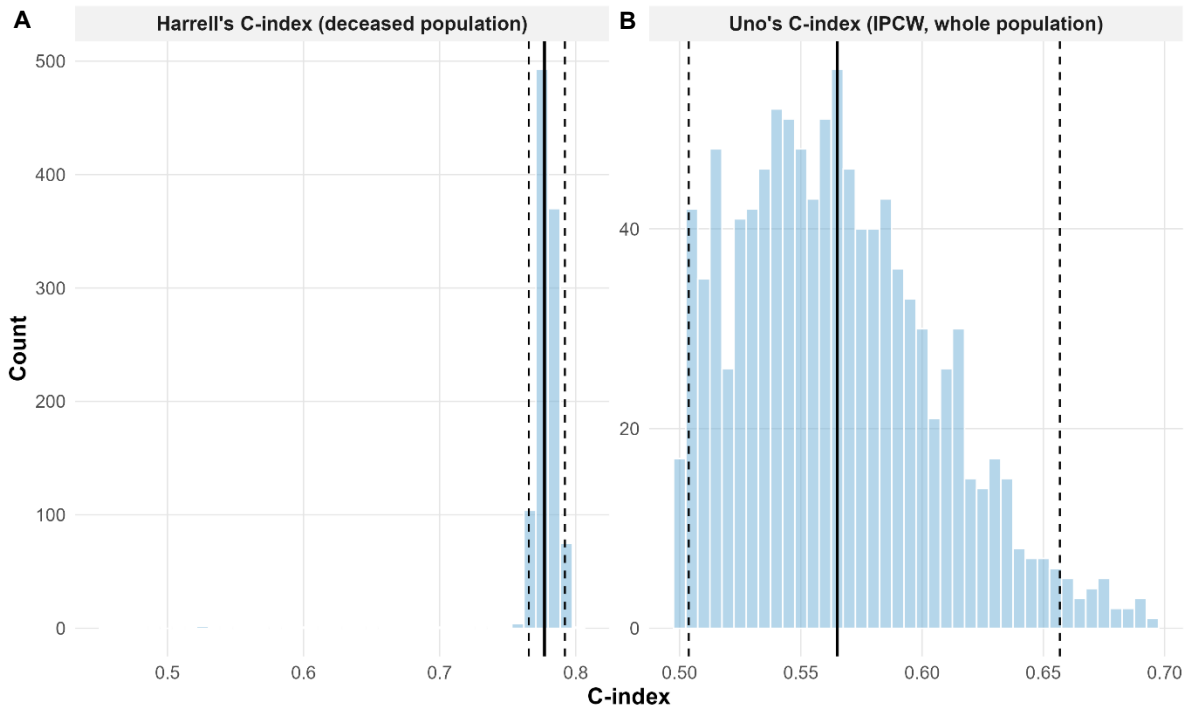

**Supplementary Figure SI3:** Bootstrap distributions (1,000 replicates) of model discrimination during training (calculated on out-of-bag (oob) data). **A** Harrell's C-index evaluated in the deceased subset (mean=0.777; 95% CI: 0.766-0.792), reflecting discrimination conditional on observed events (death). **B** Uno's C-index computed in the full cohort using inverse probability of censoring weighting (IPCW) (mean=0.565; 95% CI: 0.504-0.657), accounting for the high degree of right-censoring in the population. Both metrics exceed chance level ( $C=0.5$ ), indicating meaningful discriminative performance.

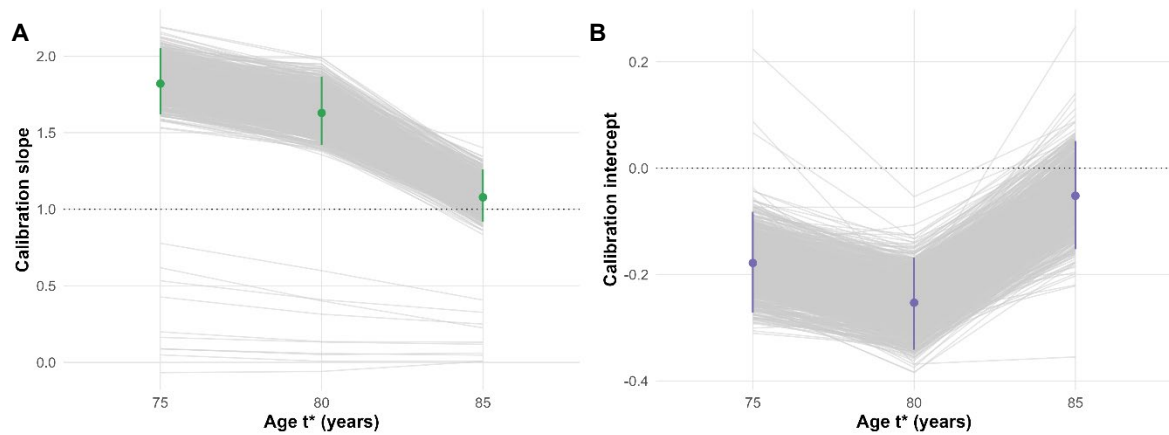

**Supplementary Figure S14:** IPCW-based calibration performance during training across prespecified ages. **A** Bootstrap distributions (1,000 replicates) of calibration slopes evaluated at ages at interview 75, 80 and 85 years, with points indicating the mean and error bars the 95% confidence intervals. **B** Corresponding calibration intercepts. The dotted horizontal lines denote the ideal values (slope=1; intercept=0). Calibration slopes approach unity with increasing age, while intercepts remain close to zero, indicating overall good calibration of predicted survival times at 85 years under inverse probability of censoring weighting (IPCW).

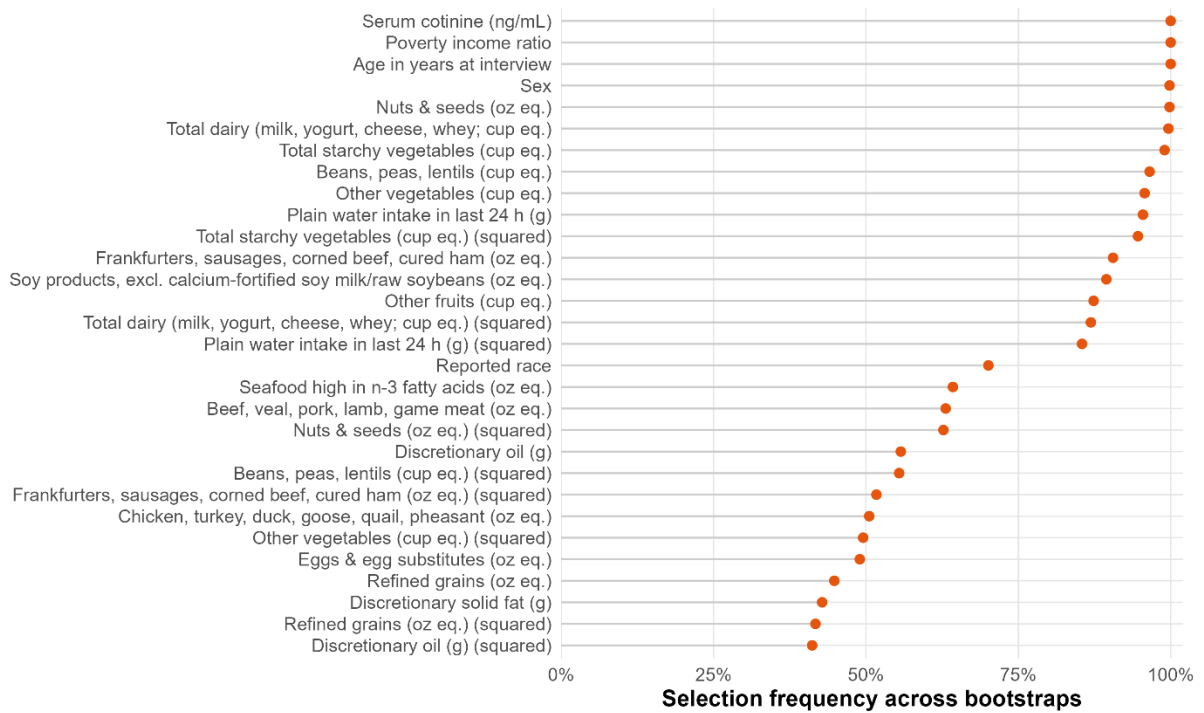

**Supplementary Figure SI5:** Top 30 predictors ranked by bootstrap selection frequency during training. Points indicate the proportion of bootstrap replicates in which each variable was selected in the penalized AFT model, reflecting the stability and relative importance of predictors across resamples. Both linear and squared terms are shown, highlighting non-linear contributions of dietary factors. Variables with higher selection frequencies represent more consistently retained predictors across bootstrap iterations.

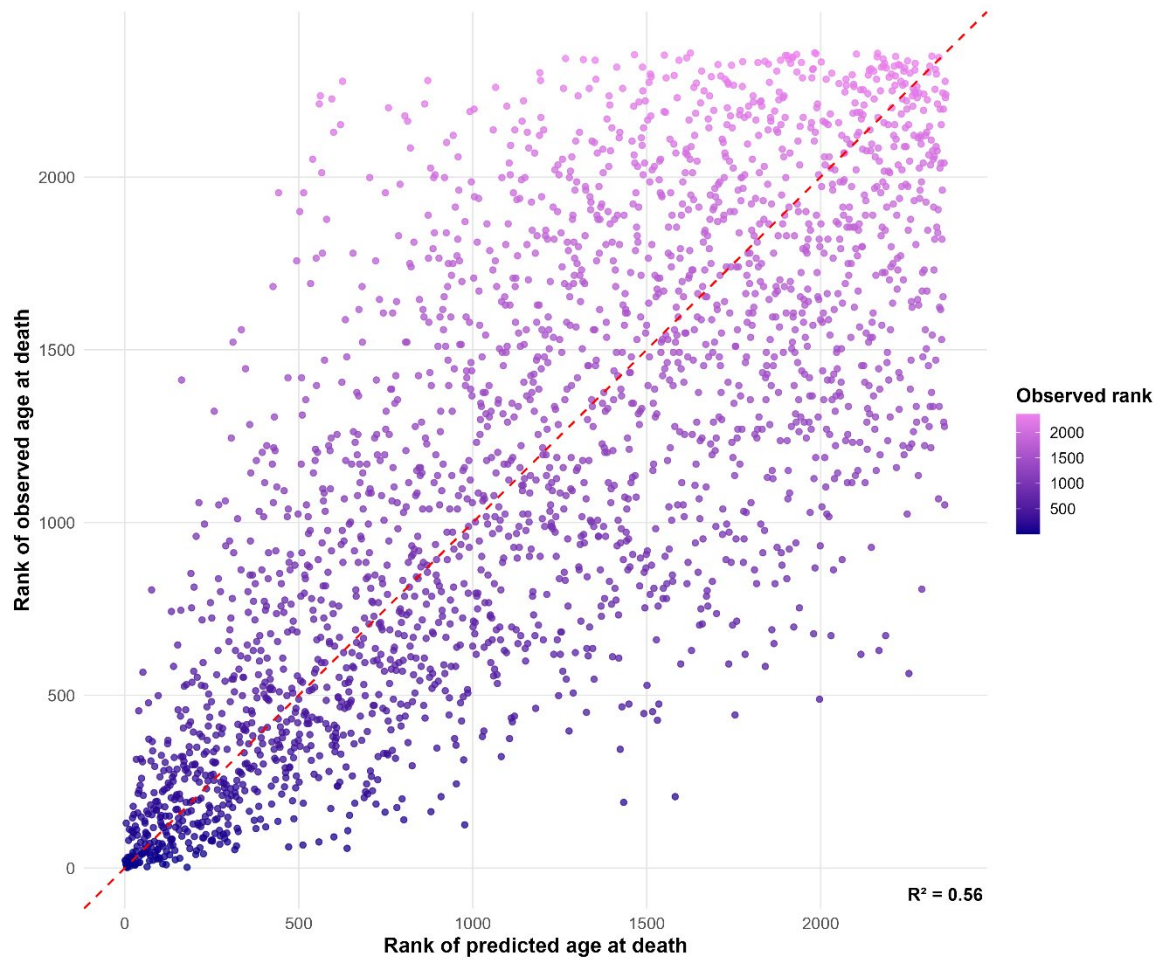

**Supplementary Figure S16:** Rank-based evaluation of predicted age at death among deceased respondents. Scatter plot comparing the rank of predicted age at death (x-axis) with the rank of observed age at death (y-axis) in the deceased sub-population. The red dashed line denotes the line of identity (perfect rank agreement). Point colors indicate observed rank. The coefficient of determination ( $R^2$ ) summarizes agreement between predicted and observed ranks.

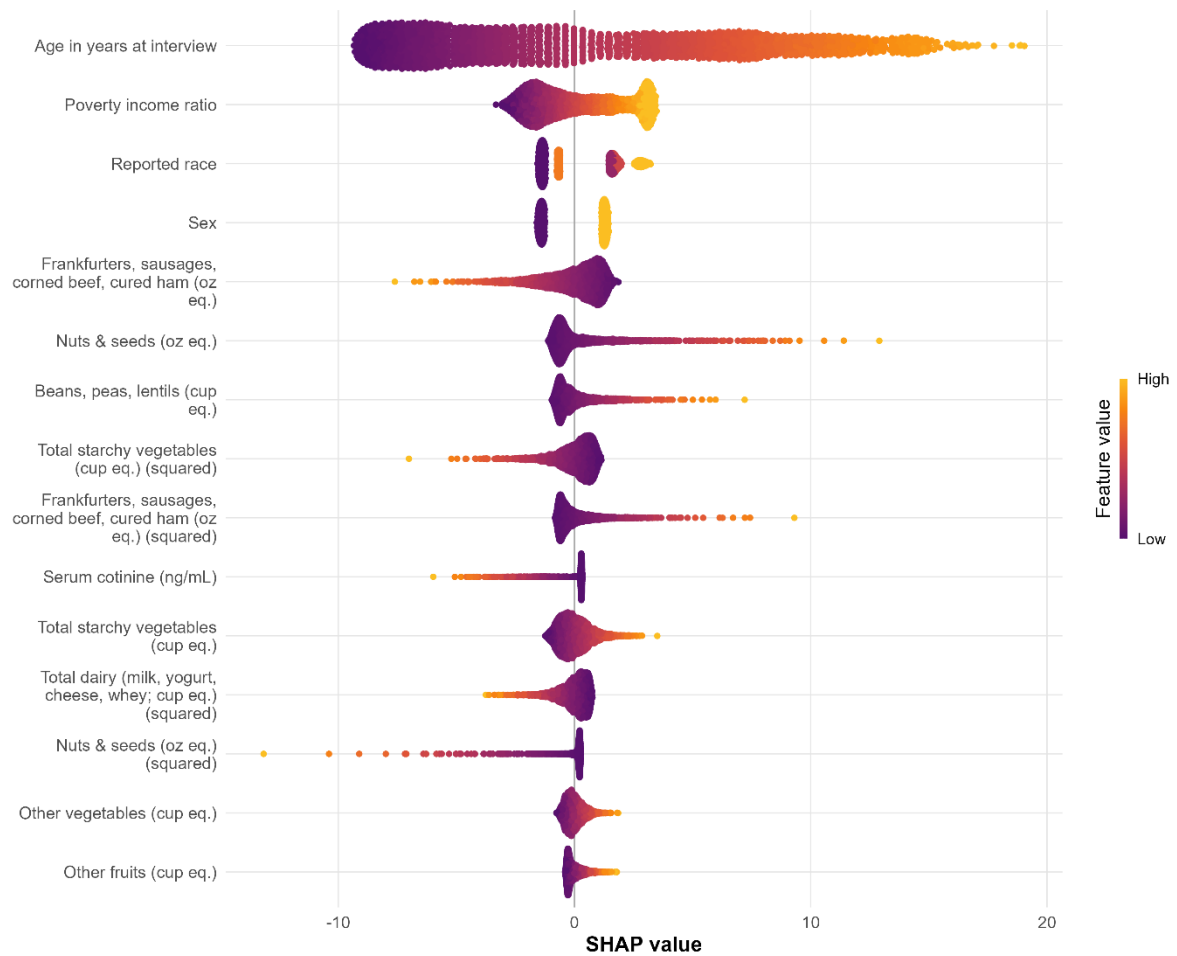

**Supplementary Figure S17:** SHAP summary (beeswarm) plot for the final penalized AFT model. Features are ranked by mean absolute SHAP value, indicating their overall contribution to the model's predictions. Each point represents one participant; the horizontal position shows the SHAP value (direction and magnitude of the feature's contribution) and color denotes the feature value (low to high). Positive versus negative SHAP values indicate shifts toward the model's predicted outcome on the time scale (i.e., longer versus shorter predicted survival, respectively), with squared terms capturing non-linear contributions. For exposures modeled with both linear and squared terms, the two SHAP components should be interpreted jointly, as considering either term in isolation may give an incomplete or potentially misleading interpretation of the exposure-survival relationship.

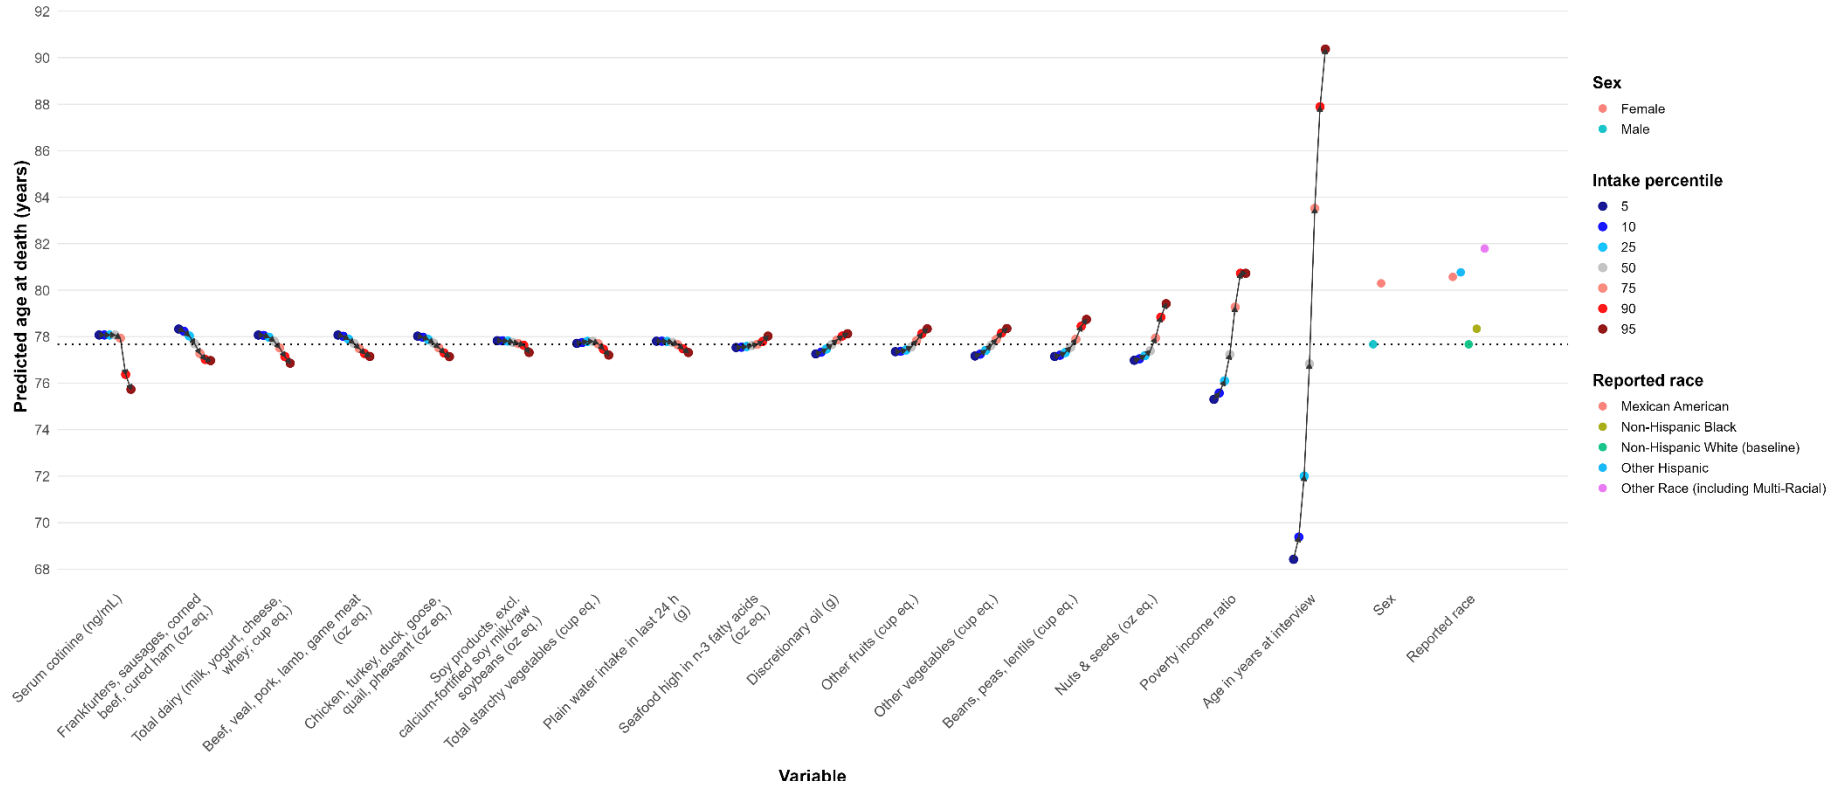

**Supplementary Figure S18:** Raindrop plot of predicted age at death across exposure levels. Predicted age at death from the final penalized AFT model is shown for each retained variable, evaluated at selected intake percentiles for continuous exposures (5th, 10th, 25th, 50th, 75th, 90th and 95th) and across category levels for categorical variables (sex and reported race). For each continuous variable, points are connected to visualize how predicted age at death changes across the exposure distribution, thereby summarizing potentially non-linear effects. The horizontal blue dashed line indicates the cohort mean predicted life expectancy (77.7 years). Variables are ordered by the difference between the 95th and 5th percentile predictions, from the most detrimental to the most beneficial. When varying a given variable across percentiles (or category levels),

all other continuous predictors are held at their median (50th percentile) and categorical predictors at their reference level. Race results are de facto corrected by PIR, gender and food intakes.

**A**

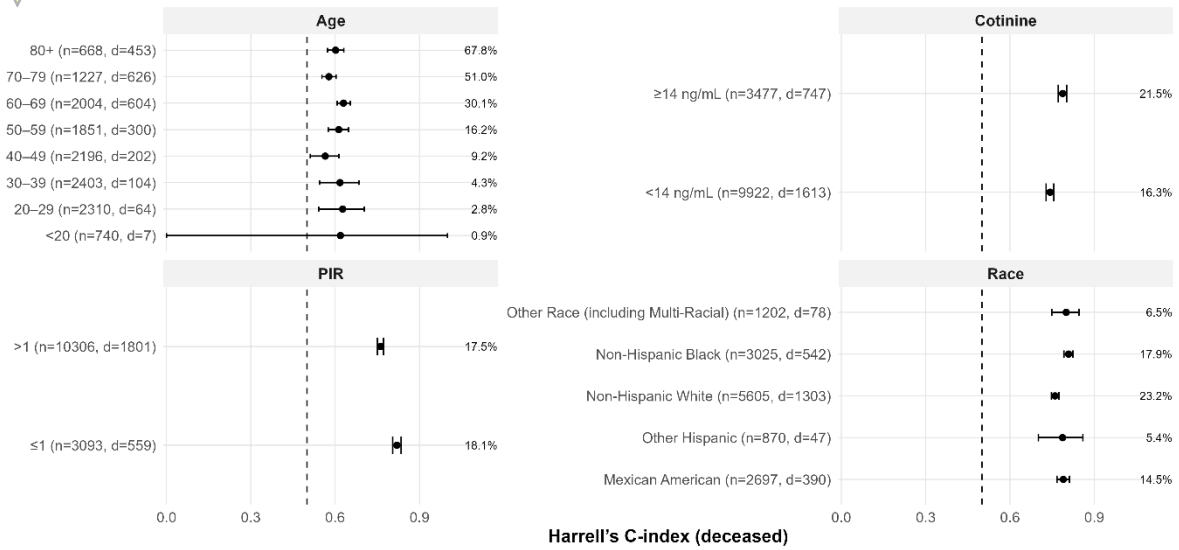

**B**

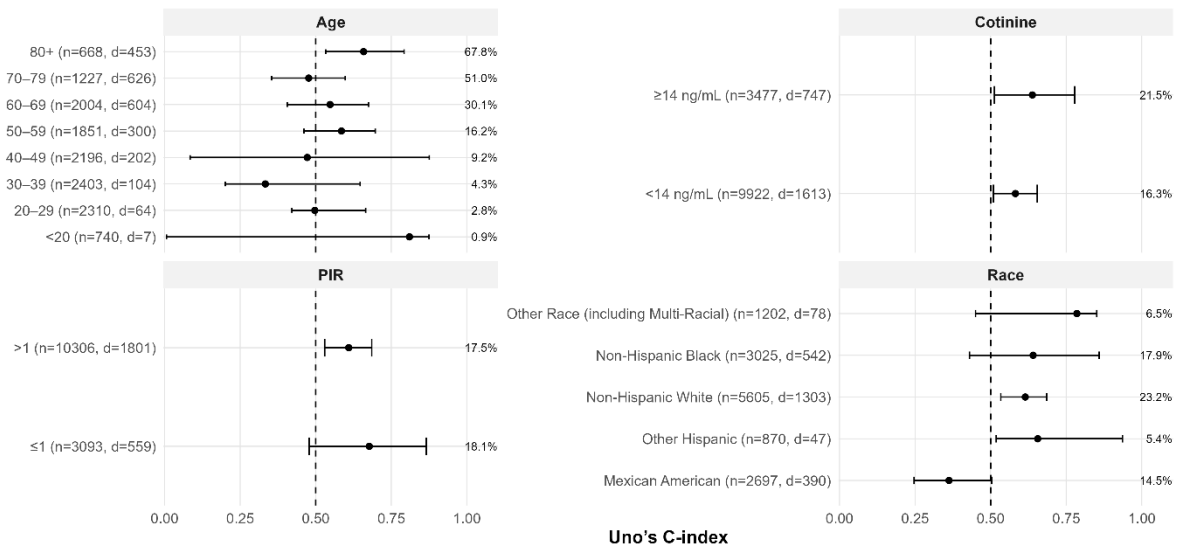

**Supplementary Figure S19: Discrimination by subgroup for the final model. A** Harrell's C-index estimated among deceased participants only. **B** Uno's C-index (IPCW) estimated in the full cohort within prespecified subgroups to account for right-censoring. In both panels, points indicate subgroup-specific concordance estimates and horizontal bars denote 95% bootstrap confidence intervals. Subgroups are defined by age at questionnaire, serum cotinine (<14 vs ≥14 ng/mL), poverty income ratio (≤1 vs >1) and reported race. Sample size (n) and number of deaths (d) are shown in parentheses, and the death percentage within each subgroup is reported on the right side. The vertical dashed line marks the overall reference value for comparison across strata (chance level, C = 0.5).

**A**

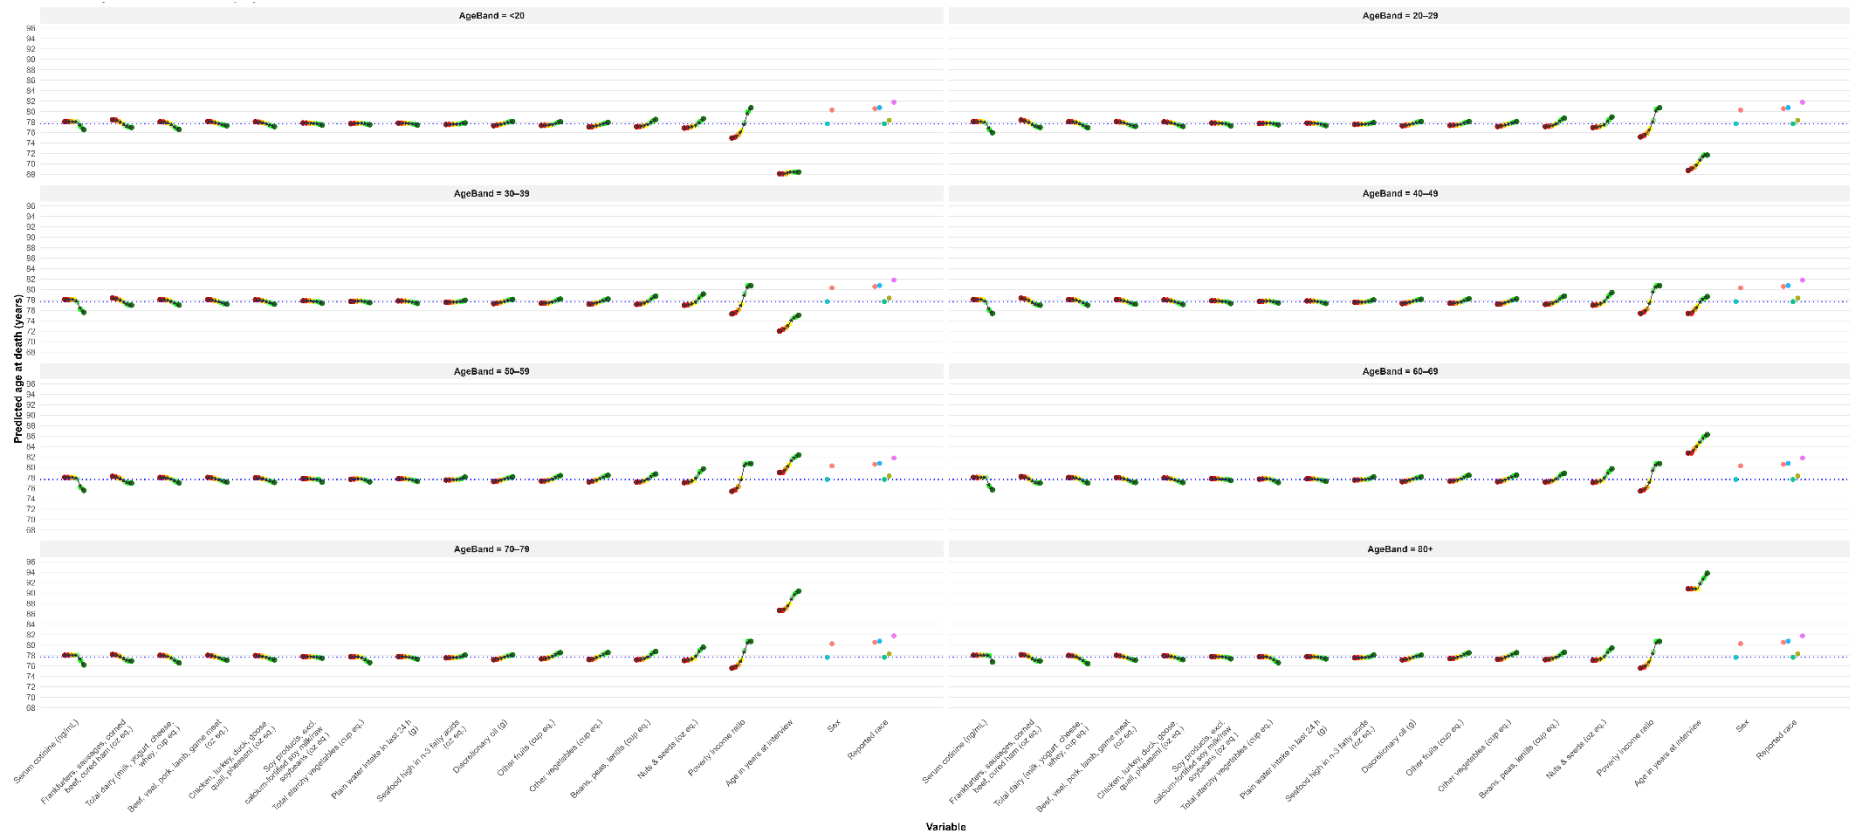

**B**

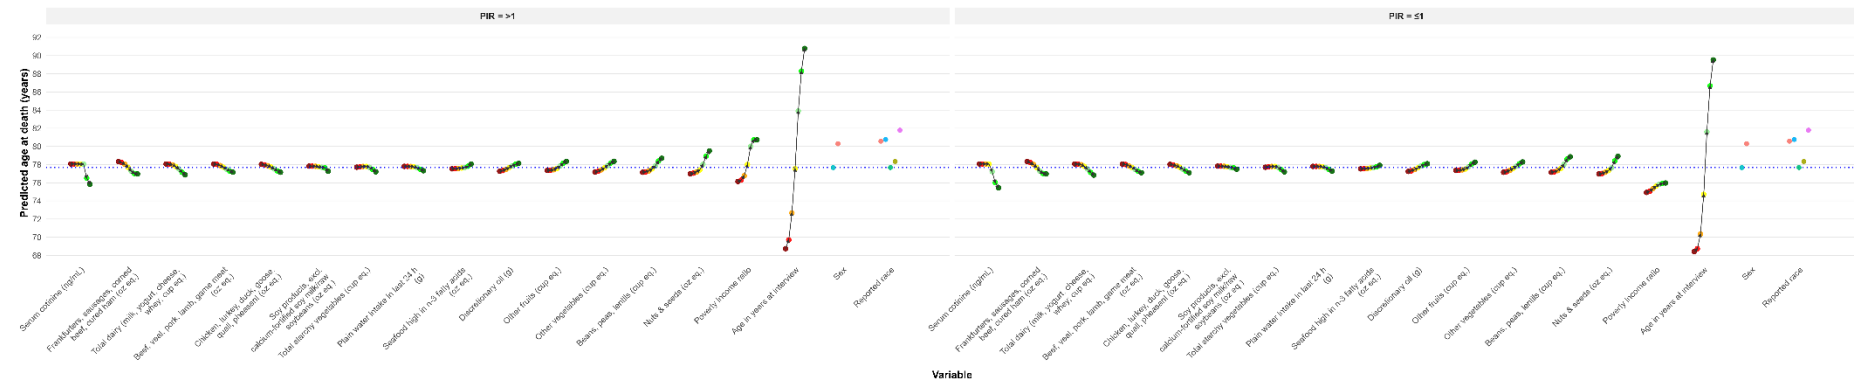

Variable

**C**

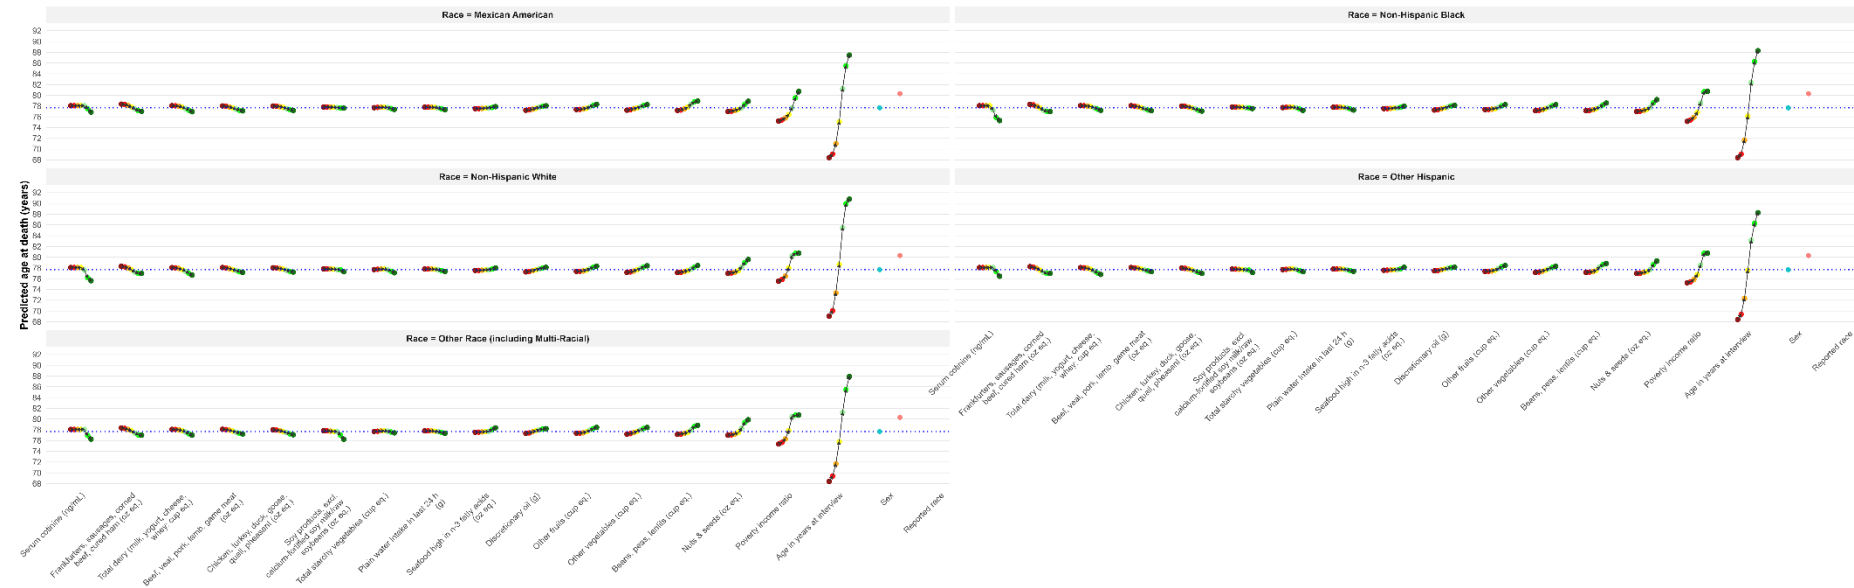

Variable

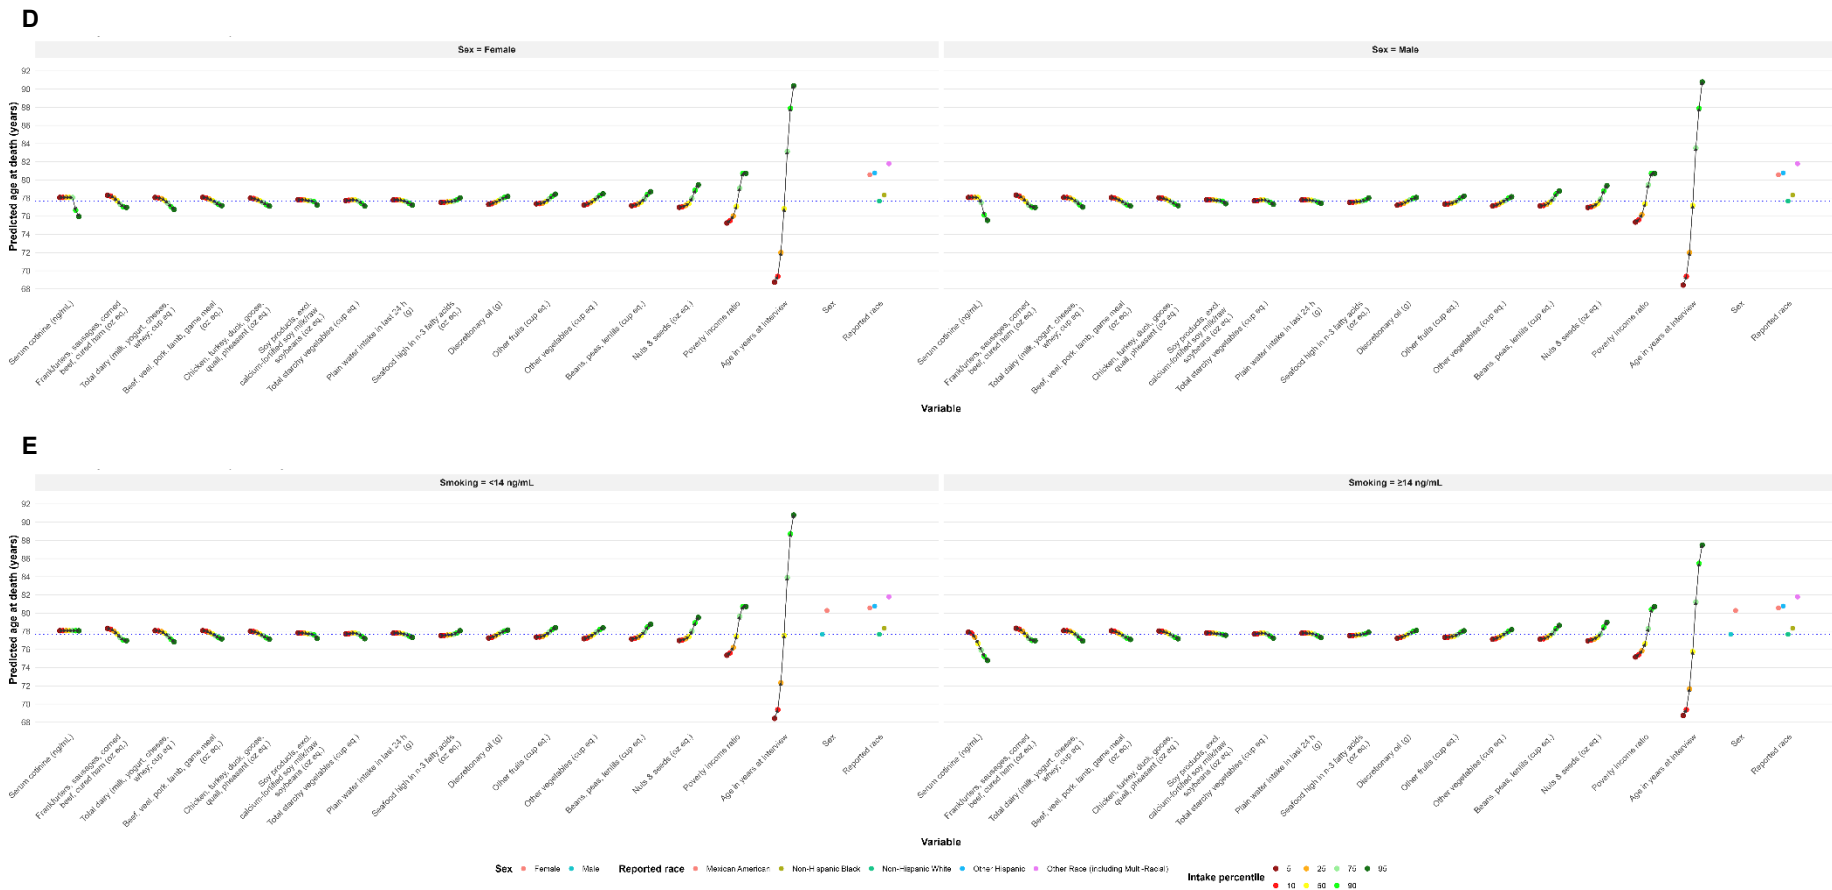

**Supplementary Figure SI10: Sensitivity analysis: raindrop plots stratified by participant subgroups.** Multi-panel raindrop plots display predicted age at death from the final penalized AFT model across selected intake percentiles for continuous exposures (5th, 10th, 25th, 50th, 75th, 90th, 95th) and across category levels for categorical variables, with all other continuous covariates held at their median (50th percentile) (and categorical covariates at their reference levels) within each stratum. Points are connected within each exposure to show changes in predicted

age at death across the exposure distribution; the horizontal dashed line denotes the overall mean predicted life expectancy of the cohort (77.7 years). Panels show stratification by **A** age band, **B** poverty income ratio (PIR;  $\leq 1$  vs  $> 1$ ), **C** reported race, **D** sex and **E** smoking status (serum cotinine  $< 14$  vs  $\geq 14$  ng/mL).

**Supplementary Table S11:** Descriptive statistics of the study population and predictors included in the analysis (n=44,666 participants; 29 predictors).

| Variable | Variable description                                                              | Type         | Level | Mean    | Median [25th, 75th]      | SD     | Counts (%)    |
|----------|-----------------------------------------------------------------------------------|--------------|-------|---------|--------------------------|--------|---------------|
| GENDERRC | Sex (Male)                                                                        | Demographics | 1     | -       | -                        | -      | 21440 (48%)   |
|          | Sex (Female)                                                                      | Demographics | 2     | -       | -                        | -      | 23226 (52%)   |
| RIDRETH1 | Reported race and Hispanic origin information (non-Hispanic White)                | Demographics | 3     | -       | -                        | -      | 18940 (42.4%) |
|          | Reported race and Hispanic origin information (Mexican American)                  | Demographics | 1     | -       | -                        | -      | 8760 (19.6%)  |
|          | Reported race and Hispanic origin information (other Hispanic)                    | Demographics | 2     | -       | -                        | -      | 2852 (6.4%)   |
|          | Reported race and Hispanic origin information (non-Hispanic Black)                | Demographics | 4     | -       | -                        | -      | 10280 (23%)   |
|          | Reported race and Hispanic origin information (other Race including multi-Racial) | Demographics | 5     | -       | -                        | -      | 3834 (8.6%)   |
| RIDAGEYR | Age in years at interview                                                         | Demographics | -     | 46.42   | 45 [30, 62]              | 18.61  | -             |
| INDFMPIR | Poverty income ratio                                                              | Demographics | -     | 2.43    | 2.04 [1.07, 3.76]        | 1.59   | -             |
| MORTSTAT | Mortality status until Dec. 31, 2018 (Alive)                                      | Mortality    | 0     | -       | -                        | -      | 36797 (82.4%) |
|          | Mortality status until Dec. 31, 2018 (Deceased)                                   | Mortality    | 1     | -       | -                        | -      | 7869 (17.6%)  |
| End      | Age in years at mortality follow-up                                               | Mortality    | -     | 58.82   | 58.92 [45.17, 73]        | 18.33  | -             |
| LBXCOT   | Serum cotinine (ng/mL)                                                            | Chemicals    | -     | 60.66   | 0.11 [0.02, 21.28]       | 131.67 | -             |
| DRX.320Z | Plain water intake in last 24 h (g)                                               | Dietary      | -     | 1104.68 | 987.12 [572.79, 1472.25] | 715.55 | -             |

|                   |                                                                      |         |   |         |                            |        |   |
|-------------------|----------------------------------------------------------------------|---------|---|---------|----------------------------|--------|---|
| DRXTKCAL          | Total energy intake (kcal)                                           | Dietary | - | 2053.13 | 1993.22 [1680.73, 2369.44] | 518.67 | - |
| DRXT_A_DRINKS     | Alcoholic drinks (number of drinks)                                  | Dietary | - | 0.5     | 0.13 [0.06, 0.35]          | 0.92   | - |
| DRXT_D_TOTAL      | Total dairy (milk, yogurt, cheese, whey; cup eq.)                    | Dietary | - | 1.43    | 1.36 [0.96, 1.79]          | 0.66   | - |
| DRXT_F_CITMLB     | Citrus, melons, berries (cup eq.)                                    | Dietary | - | 0.27    | 0.18 [0.1, 0.33]           | 0.25   | - |
| DRXT_F_OTHER      | Other fruits (cup eq.)                                               | Dietary | - | 0.51    | 0.38 [0.24, 0.69]          | 0.34   | - |
| DRXT_G_REFINED    | Refined grains (oz eq.)                                              | Dietary | - | 5.71    | 5.55 [4.53, 6.7]           | 1.7    | - |
| DRXT_G_WHOLE      | Whole grains (oz eq.)                                                | Dietary | - | 0.8     | 0.61 [0.42, 1.06]          | 0.51   | - |
| DRXT_OILS         | Discretionary oil (g)                                                | Dietary | - | 20.66   | 19.84 [15.24, 25.55]       | 7.76   | - |
| DRXT_PF_CUREDMEAT | Frankfurters, sausages, corned beef, cured ham (oz eq.)              | Dietary | - | 0.83    | 0.7 [0.54, 1.03]           | 0.39   | - |
| DRXT_PF_EGGS      | Eggs and egg substitutes (oz eq.)                                    | Dietary | - | 0.57    | 0.48 [0.36, 0.71]          | 0.28   | - |
| DRXT_PF_MEAT      | Beef, veal, pork, lamb, game meat (oz eq.)                           | Dietary | - | 1.7     | 1.58 [1.23, 2.06]          | 0.63   | - |
| DRXT_PF_NUTSDS    | Nuts and seeds (oz eq.)                                              | Dietary | - | 0.53    | 0.33 [0.26, 0.58]          | 0.5    | - |
| DRXT_PF_POULT     | Chicken, turkey, duck, goose, quail, pheasant (oz eq.)               | Dietary | - | 1.5     | 1.41 [1.14, 1.73]          | 0.44   | - |
| DRXT_PF_SEAFD_HI  | Seafood high in n-3 fatty acids (oz eq.)                             | Dietary | - | 0.13    | 0.1 [0.09, 0.13]           | 0.11   | - |
| DRXT_PF_SEAFD_LOW | Seafood low in n-3 fatty acids (oz eq.)                              | Dietary | - | 0.44    | 0.35 [0.32, 0.47]          | 0.2    | - |
| DRXT_PF_SOY       | Soy products, excl. calcium-fortified soy milk/raw soybeans (oz eq.) | Dietary | - | 0.05    | 0.03 [0.01, 0.04]          | 0.12   | - |
| DRXT_SOLID_FATS   | Discretionary solid fat (g)                                          | Dietary | - | 39.08   | 37.3 [28.99, 47.35]        | 14.05  | - |
| DRXT_V_DRKGR      | Dark green vegetables (cup eq.)                                      | Dietary | - | 0.12    | 0.08 [0.07, 0.12]          | 0.09   | - |
| DRXT_V_LEGUMES    | Beans, peas, lentils (cup eq.)                                       | Dietary | - | 0.13    | 0.1 [0.08, 0.15]           | 0.1    | - |

|                      |                                                              |         |   |      |                   |      |   |
|----------------------|--------------------------------------------------------------|---------|---|------|-------------------|------|---|
| DRXT_V_OTHER         | Other vegetables (cup eq.)                                   | Dietary | - | 0.52 | 0.51 [0.39, 0.64] | 0.18 | - |
| DRXT_V_REDOR_OTHER   | Other red and orange vegetables, excl.<br>tomatoes (cup eq.) | Dietary | - | 0.09 | 0.07 [0.06, 0.1]  | 0.05 | - |
| DRXT_V_REDOR_TOMATO  | Tomatoes and tomato products (cup eq.)                       | Dietary | - | 0.28 | 0.27 [0.22, 0.34] | 0.09 | - |
| DRXT_V_STARCHY_TOTAL | Total starchy vegetables (cup eq.)                           | Dietary | - | 0.45 | 0.43 [0.35, 0.52] | 0.13 | - |

---

---

**Supplementary Table SI2:** Comparison of participant characteristics between complete cases included in the analysis and participants excluded due to missing data (n=21,052). Categorical variables are summarized as counts (percentages) and continuous variables as mean (standard deviation). P values correspond to group comparisons to assess potential selection bias associated with complete-case analysis.

| Variable description                                                              | Type        | Level | Complete cases* | Excluded cases* | p value** |
|-----------------------------------------------------------------------------------|-------------|-------|-----------------|-----------------|-----------|
| Sex (Male)                                                                        | Categorical | 1     | 21504 (48.1%)   | 31710 (49.2%)   | <0.001    |
| Sex (Female)                                                                      | Categorical | 2     | 23242 (51.9%)   | 32802 (50.8%)   | <0.001    |
| Reported race and Hispanic origin information (non-Hispanic White)                | Categorical | 3     | 18970 (42.4%)   | 20931 (32.4%)   | <0.001    |
| Reported race and Hispanic origin information (Mexican American)                  | Categorical | 1     | 8770 (19.6%)    | 17807 (27.6%)   | <0.001    |
| Reported race and Hispanic origin information (other Hispanic)                    | Categorical | 2     | 2856 (6.4%)     | 3805 (5.9%)     | <0.001    |
| Reported race and Hispanic origin information (non-Hispanic Black)                | Categorical | 4     | 10311 (23%)     | 17354 (26.9%)   | <0.001    |
| Reported race and Hispanic origin information (other Race including multi-Racial) | Categorical | 5     | 3839 (8.6%)     | 4615 (7.2%)     | <0.001    |
| Age in years at interview                                                         | Continuous  | -     | 46.4 (18.6)     | 20.8 (21.4)     | <0.001    |
| Poverty income ratio                                                              | Continuous  | -     | 2.4 (1.6)       | 2.1 (1.5)       | <0.001    |
| Mortality status until Dec. 31, 2018 (Alive)                                      | Categorical | 0     | 36869 (82.4%)   | 16314 (77.5%)   | <0.001    |
| Mortality status until Dec. 31, 2018 (Deceased)                                   | Categorical | 1     | 7877 (17.6%)    | 4738 (22.5%)    | <0.001    |
| Age in years at mortality follow-up                                               | Continuous  | -     | 58.8 (18.3)     | 60.8 (18.5)     | <0.001    |
| Serum cotinine (ng/mL)                                                            | Continuous  | -     | 60.8 (131.8)    | 22.2 (77.3)     | <0.001    |
| Plain water intake in last 24 h (g)                                               | Continuous  | -     | 1105.1 (716.1)  | 776.9 (610.4)   | <0.001    |
| Total energy intake (kcal)                                                        | Continuous  | -     | 2056.5 (527.9)  | 1919.8 (512.7)  | <0.001    |
| Alcoholic drinks (number of drinks)                                               | Continuous  | -     | 0.5 (0.9)       | 0.2 (0.7)       | <0.001    |
| Total dairy (milk, yogurt, cheese, whey; cup eq.)                                 | Continuous  | -     | 1.4 (0.7)       | 1.9 (0.8)       | <0.001    |
| Citrus, melons, berries (cup eq.)                                                 | Continuous  | -     | 0.3 (0.3)       | 0.4 (0.3)       | <0.001    |
| Other fruits (cup eq.)                                                            | Continuous  | -     | 0.5 (0.3)       | 0.6 (0.3)       | <0.001    |

|                                                                      |            |   |             |             |        |
|----------------------------------------------------------------------|------------|---|-------------|-------------|--------|
| Refined grains (oz eq.)                                              | Continuous | - | 5.7 (1.7)   | 5.7 (1.9)   | 0.1    |
| Whole grains (oz eq.)                                                | Continuous | - | 0.8 (0.5)   | 0.6 (0.4)   | <0.001 |
| Discretionary oil (g)                                                | Continuous | - | 20.7 (7.8)  | 17 (6.7)    | <0.001 |
| Frankfurters, sausages, corned beef, cured ham (oz eq.)              | Continuous | - | 0.8 (0.4)   | 0.7 (0.3)   | <0.001 |
| Eggs and egg substitutes (oz eq.)                                    | Continuous | - | 0.6 (0.3)   | 0.5 (0.2)   | <0.001 |
| Beef, veal, pork, lamb, game meat (oz eq.)                           | Continuous | - | 1.7 (0.6)   | 1.4 (0.6)   | <0.001 |
| Nuts and seeds (oz eq.)                                              | Continuous | - | 0.5 (0.5)   | 0.4 (0.3)   | <0.001 |
| Chicken, turkey, duck, goose, quail, pheasant (oz eq.)               | Continuous | - | 1.5 (0.4)   | 1.2 (0.4)   | <0.001 |
| Seafood high in n-3 fatty acids (oz eq.)                             | Continuous | - | 0.1 (0.1)   | 0.1 (0.1)   | <0.001 |
| Seafood low in n-3 fatty acids (oz eq.)                              | Continuous | - | 0.4 (0.2)   | 0.3 (0.1)   | <0.001 |
| Soy products, excl. calcium-fortified soy milk/raw soybeans (oz eq.) | Continuous | - | 0 (0.1)     | 0 (0.1)     | <0.001 |
| Discretionary solid fat (g)                                          | Continuous | - | 39.2 (14.2) | 40.7 (14.4) | <0.001 |
| Dark green vegetables (cup eq.)                                      | Continuous | - | 0.1 (0.1)   | 0.1 (0.1)   | <0.001 |
| Beans, peas, lentils (cup eq.)                                       | Continuous | - | 0.1 (0.1)   | 0.1 (0.1)   | <0.001 |
| Other vegetables (cup eq.)                                           | Continuous | - | 0.5 (0.2)   | 0.4 (0.2)   | <0.001 |
| Other red and orange vegetables, excl. tomatoes (cup eq.)            | Continuous | - | 0.1 (0)     | 0.1 (0)     | <0.001 |
| Tomatoes and tomato products (cup eq.)                               | Continuous | - | 0.3 (0.1)   | 0.3 (0.1)   | <0.001 |
| Total starchy vegetables (cup eq.)                                   | Continuous | - | 0.4 (0.1)   | 0.4 (0.1)   | <0.001 |

\* counts (percentage) for categorical variables and mean (standard deviation) for continuous variables

\*\* Welch's two-sample t-test for continuous variables and Pearson's chi-square test for categorical variables; all tests are unadjusted

**Supplementary Table S13:** Multicollinearity test using the Variance Inflation Factor (VIF). The generalized variance inflation factor (GVIF) is reported, together with its associated degrees of freedom (df). To allow comparison across variables with different df, the normalized GVIF is presented. A VIF value of 1 indicates no correlation with other predictors, implying the absence of multicollinearity in the model.

| <b>Variable description</b>                                         | <b>Type</b> | <b>GVIF</b> | <b>Df*</b> | <b>Normalized GVIF**</b> |
|---------------------------------------------------------------------|-------------|-------------|------------|--------------------------|
| Whole grains (oz eq.)                                               | Dietary     | 1.373       | 1          | 1.172                    |
| Refined grains (oz eq.)                                             | Dietary     | 1.335       | 1          | 1.156                    |
| Dark green vegetables (cup eq.)                                     | Dietary     | 1.354       | 1          | 1.164                    |
| Other red and orange vegetables, excl. tomatoes (cup eq.)           | Dietary     | 1.411       | 1          | 1.188                    |
| Total starchy vegetables (cup eq.)                                  | Dietary     | 1.562       | 1          | 1.250                    |
| Tomatoes and tomato products (cup eq.)                              | Dietary     | 1.468       | 1          | 1.212                    |
| Other vegetables (cup eq.)                                          | Dietary     | 1.706       | 1          | 1.306                    |
| Citrus, melons, berries (cup eq.)                                   | Dietary     | 1.431       | 1          | 1.196                    |
| Other fruits (cup eq.)                                              | Dietary     | 1.359       | 1          | 1.166                    |
| Total dairy (milk, yogurt, cheese, whey; cup eq.)                   | Dietary     | 1.277       | 1          | 1.130                    |
| Beef, veal, pork, lamb, game meat (oz eq.)                          | Dietary     | 1.580       | 1          | 1.257                    |
| Frankfurters, sausages, corned beef, cured ham (oz eq.)             | Dietary     | 1.356       | 1          | 1.164                    |
| Chicken, turkey, duck, goose, quail, pheasant (oz eq.)              | Dietary     | 1.423       | 1          | 1.193                    |
| Seafood high in n-3 fatty acids (oz eq.)                            | Dietary     | 1.191       | 1          | 1.091                    |
| Seafood low in n-3 fatty acids (oz eq.)                             | Dietary     | 1.269       | 1          | 1.126                    |
| Eggs and egg substitutes (oz eq.)                                   | Dietary     | 1.267       | 1          | 1.126                    |
| Soy products excl. calcium-fortified soy milk/raw soybeans (oz eq.) | Dietary     | 1.085       | 1          | 1.042                    |
| Nuts and seeds (oz eq.)                                             | Dietary     | 1.197       | 1          | 1.094                    |
| Beans, peas, lentils (cup eq.)                                      | Dietary     | 1.169       | 1          | 1.081                    |
| Discretionary oil (g)                                               | Dietary     | 2.530       | 1          | 1.591                    |
| Discretionary solid fat (g)                                         | Dietary     | 1.944       | 1          | 1.394                    |
| Alcoholic drinks (number of drinks)                                 | Dietary     | 1.198       | 1          | 1.095                    |

|                                               |              |       |   |       |
|-----------------------------------------------|--------------|-------|---|-------|
| Plain water intake in last 24 h (g)           | Dietary      | 1.362 | 1 | 1.167 |
| Age in years at interview                     | Demographics | 1.865 | 1 | 1.365 |
| Reported race and Hispanic origin information | Demographics | 1.827 | 4 | 1.078 |
| Poverty income ratio                          | Demographics | 1.232 | 1 | 1.110 |
| Serum cotinine (ng/mL)                        | Chemicals    | 1.121 | 1 | 1.059 |
| Sex                                           | Demographics | 1.549 | 2 | 1.245 |

---

\*Number of coefficients

\*\*Normalized GVIF =  $GVIF^{1/(2 \cdot Df)}$ ; comparable across different numbers of parameters

**Supplementary Table S14:** Multiple-testing correction for dietary exposures using the Benjamini-Hochberg false discovery rate (FDR) procedure. Raw p values are derived from comparing a lifestyle-only Weibull AFT model with models additionally including each dietary exposure. Adjusted p values reflect FDR correction across all tested exposures. The Selected (FDR) column indicates whether each variable met the prespecified FDR threshold of 10% and was retained for further modeling (TRUE) or excluded (FALSE).

| <b>Variable description</b>                                          | <b>Raw p value*</b> | <b>BH-FDR p value**</b> | <b>Selected (FDR)</b> |
|----------------------------------------------------------------------|---------------------|-------------------------|-----------------------|
| Nuts and seeds (oz eq.)                                              | <0.001              | <0.001                  | TRUE                  |
| Total starchy vegetables (cup eq.)                                   | <0.001              | <0.001                  | TRUE                  |
| Total dairy (milk, yogurt, cheese, whey; cup eq.)                    | <0.001              | <0.001                  | TRUE                  |
| Discretionary solid fat (g)                                          | <0.001              | <0.001                  | TRUE                  |
| Other fruits (cup eq.)                                               | <0.001              | 0.003                   | TRUE                  |
| Beef, veal, pork, lamb, game meat (oz eq.)                           | <0.001              | 0.003                   | TRUE                  |
| Beans, peas, lentils (cup eq.)                                       | 0.001               | 0.003                   | TRUE                  |
| Plain water intake in last 24 h (g)                                  | 0.002               | 0.005                   | TRUE                  |
| Frankfurters, sausages, corned beef, cured ham (oz eq.)              | 0.003               | 0.007                   | TRUE                  |
| Discretionary oil (g)                                                | 0.003               | 0.007                   | TRUE                  |
| Seafood high in n-3 fatty acids (oz eq.)                             | 0.025               | 0.053                   | TRUE                  |
| Refined grains (oz eq.)                                              | 0.032               | 0.057                   | TRUE                  |
| Chicken, turkey, duck, goose, quail, pheasant (oz eq.)               | 0.032               | 0.057                   | TRUE                  |
| Soy products, excl. calcium-fortified soy milk/raw soybeans (oz eq.) | 0.036               | 0.059                   | TRUE                  |
| Other vegetables (cup eq.)                                           | 0.047               | 0.072                   | TRUE                  |
| Eggs and egg substitutes (oz eq.)                                    | 0.056               | 0.08                    | TRUE                  |
| Whole grains (oz eq.)                                                | 0.255               | 0.345                   | FALSE                 |
| Citrus, melons, berries (cup eq.)                                    | 0.282               | 0.36                    | FALSE                 |
| Tomatoes and tomato products (cup eq.)                               | 0.314               | 0.38                    | FALSE                 |
| Dark green vegetables (cup eq.)                                      | 0.538               | 0.619                   | FALSE                 |
| Other red and orange vegetables, excl. tomatoes (cup eq.)            | 0.587               | 0.643                   | FALSE                 |
| Alcoholic drinks (number of drinks)                                  | 0.782               | 0.818                   | FALSE                 |
| Seafood low in n-3 fatty acids (oz eq.)                              | 0.845               | 0.845                   | FALSE                 |

\*Likelihood-ratio tests comparing a lifestyle-only Weibull AFT model versus the model additionally including each exposure

\*\*Benjamini-Hochberg adjusted across all exposures to control the false discovery rate

**Supplementary Information SI1: Penalized AFT model shows robust performance across resampling**

Across repeated resampling iterations within the training data, the penalized AFT framework showed stable discrimination. Concordance assessed on the out-of-bag (OOB) data among deceased participants using Harrell's C-index was 0.777 (95% CI: 0.766-0.792), whereas whole population-wide discrimination assessed using Uno's C-index with IPCW was 0.565 (95% CI: 0.504-0.657), a more modest value consistent with the high proportion of right-censoring (~80%) and sparse observed events in the full cohort (Supplementary Figure SI3); discrimination was considered together with calibration. Calibration was age-dependent. IPCW-based calibration slopes exceeded 1 at ages 75 and 80, while calibration intercepts were negative at these ages, indicating some miscalibration. Calibration approached the ideal (slope ~1, intercept ~0) by age 85 (Supplementary Figure SI4).
